# Supplementary material for: Perception of Iraqi Orthodontists and Patients toward Accelerated Orthodontics
Source: Int J Dent. 2021 Apr 29;2021:5512455. doi: 10.1155/2021/5512455 (PMC8102096; doi:10.1155/2021/5512455)
Supplement: Supplementary Materials — S1: information sheet for orthodontists and patients. S2: questionnaire for orthodontists. S3: questionnaire for patients. [file 5512455.f1.zip]

Archive with 3 entries (3 files):
- 5512455.f1/S1.doc
- 5512455.f1/S2.docx
- 5512455.f1/S3.docx
